## Research Article

# PU.1-deficient mice are resistant to thioacetamide-induced hepatic fibrosis: PU.1 finely regulates Sirt1 expression via transcriptional promotion of *miR-34a* and *miR-29c* in hepatic stellate cells

Qing Liu, Yongming Zhang, Songzhu Yang, Yanfang Wu, Jiantao Wang, Weiwei Yu and Yanguo Liu

Department of Hepatobiliary Surgery, Yantai Shan Hospital, Yantai, China

Correspondence: Qing Liu (qlgdwk@163.com)

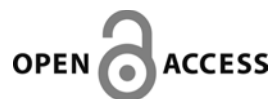

PU box binding protein (PU.1) is a critical transcription factor involved in many pathological processes. However, its exact role in activation of hepatic stellate cells (HSCs) and liver fibrosis was rarely reported. Here, we found that, in HSCs of PU.1<sup>+/-</sup> mice, *Sirt1* mRNA expression was not changed but Sirt1 protein was significantly increased, suggesting its promoting role in Sirt1 translation. We then isolated HSCs from wild-type (WT) and PU.1<sup>+/-</sup> mice, and the pcDNA-PU.1 expression vector was transfected into PU.1<sup>+/-</sup> HSCs. We checked the levels of *miR-34a* and *miR-29c*, two Sirt1-targeting miRNAs, and protein levels of PU.1 and Sirt1. The results showed that *miR-34a/-29c* were significantly reduced and Sirt1 protein was increased in PU.1<sup>+/-</sup> HSCs, compared with WT HSCs. Besides, PU.1 overexpression inversed the reduction in *miR-34a/-29c* levels and the increase in Sirt1 protein in both PU.1<sup>+/-</sup> HSCs and WT HSCs. Additionally, ChIP-quantitative real-time PCR (qPCR) assay confirmed that PU.1 was directly bound to both the promoter regions of *miR-34a* and *miR-29c*. Importantly, PU.1 overexpression promoted the proliferation, migration, activation, oxidative stress and inflammatory response in WT HSCs, while the promotion could be inversed by either overexpression of Sirt1 or inhibition of *miR-34a/-29c*. Moreover, animal model of liver fibrosis was established by intraperitoneal injections of thioacetamide (TAA) in WT and PU.1<sup>+/-</sup> mice, respectively. Compared with the WT mice, PU.1<sup>+/-</sup> mice displayed a lower fibrotic score, less collagen content, better liver function, and lower levels of oxidative stress and inflammatory response. In conclusion, PU.1 suppresses Sirt1 translation via transcriptional promotion of *miR-34a/-29c*, thus promoting Sirt1-mediated HSC activation and TAA-induced hepatic fibrosis.

Received: 11 June 2017  
Revised: 18 November 2017  
Accepted: 21 November 2017

Accepted Manuscript Online:  
21 November 2017  
Version of Record published:  
12 December 2017

## Introduction

Hepatic stellate cells (HSCs) are pericytes located in the liver perisinusoidal space, which is the major cell type involved in the healing and scar formation in response to liver damage. Stellate cells are in a quiescent state in normal conditions. When the liver is damaged, stellate cells can change into an activated state, which is characterized by proliferation, contractility, and chemotaxis [1,2]. Genes regulating proliferation and migration have attracted close attention. NAD-dependent deacetylase sirtuin-1 (SIRT1 in human and Sirt1 in mouse) has been shown to deacetylate a wide range of substrates and involved in

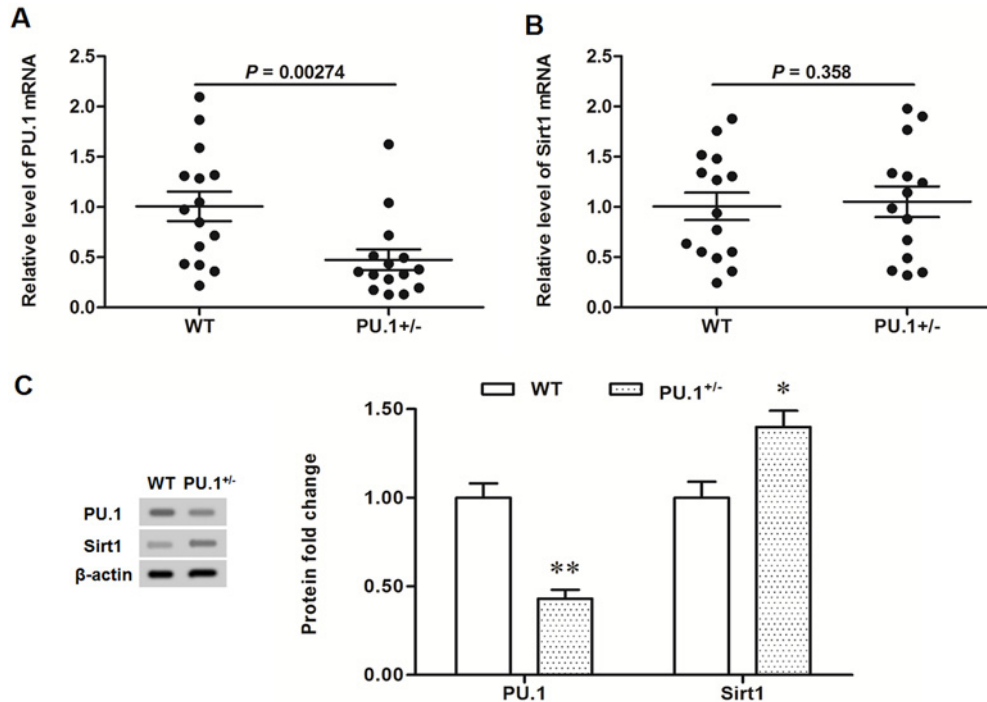

**Figure 1. Sirt1 protein was up-regulated but Sirt1 mRNA was not changed in the HSC of PU.1<sup>+/-</sup> mice**

(A) *PU.1* mRNA was down-regulated in HSCs of PU.1<sup>+/-</sup> mice compared with WT mice. (B) *Sirt1* mRNA levels in HSCs displayed no difference between PU.1<sup>+/-</sup> mice and WT mice. (C) PU.1 protein was down-regulated and Sirt1 protein was up-regulated in HSCs of PU.1<sup>+/-</sup> mice compared with WT mice. Primary HSCs were isolated from WT and PU.1 single allele deficient (PU.1<sup>+/-</sup>) newborn male C57BL/6J mice and cultured *in vitro*. Total RNA and protein were respectively extracted from the HSCs. The levels of *PU.1* mRNA and *Sirt1* mRNA were detected with qPCR. The levels of *PU.1* mRNA and *Sirt1* mRNA were detected with Western blotting.  $n=15$ , \* $P<0.05$ , \*\* $P<0.01$ .

the regulation of many physiological functions, including energy metabolism, gene transcription, and cell aging regulation [3]. Moreover, SIRT1 functions as an apoptotic inducer and inhibits cell proliferation and activation in multiple types of cells, such as several cancers and adipocytes [4-6]. Recently, a couple of studies showed that Sirt1 was sharply reduced in aged or fibrotic liver and had a negative effect on the proliferation, migration, and activation of HSCs [7,8]. Sirt1-KO mice displayed lower energy expenditure, dysregulation of fatty acid homeostasis, a higher level of inflammation, and more serious fibrosis than wild-type (WT) mice [9]. The deletion of SIRT1 enhanced liver injury and promoted liver fibrosis. Therefore, it is meaningful to clarify which transcription factors or non-coding RNAs (ncRNAs) are involved in the regulation of SIRT1 expression in this process.

PU box binding protein (PU.1) is a vital transcription factor which is famous for its fundamental role in hematopoiesis and immune system development [10,11]. PU.1 promotes transcription of hundreds of genes including many protein-coding genes and a few of non-protein-coding genes, which offers PU.1 a variety of biological functions not restricted in hematopoietic lineages [12,13]. For example, a much recent research showed that PU.1 promotes the transcription of *miR-191*, an miRNA targetting the adipogenic initial transcription factor CCAAT enhancer binding protein  $\beta$  (C/EBP $\beta$ ), to inhibit adipogenic differentiation in 3T3-L1 preadipocytes [14]. However, the role of PU.1 in the activation of HSCs and liver fibrosis is still indistinct.

In the present study, we explored the regulatory role of PU.1 in the expression of Sirt1 in mouse HSCs. Interestingly, we found that PU.1 deficiency did not change *Sirt1* mRNA but increased Sirt1 protein expression. Then, we confirmed that PU.1 negatively regulated Sirt1 protein expression through transcriptionally promoting the Sirt1-targetting miRNAs, *miR-34a* and *miR-29c*. Moreover, we investigated the effect of PU.1 on activation of HSCs *in vitro* and progression of TAA-induced liver fibrosis *in vivo*.

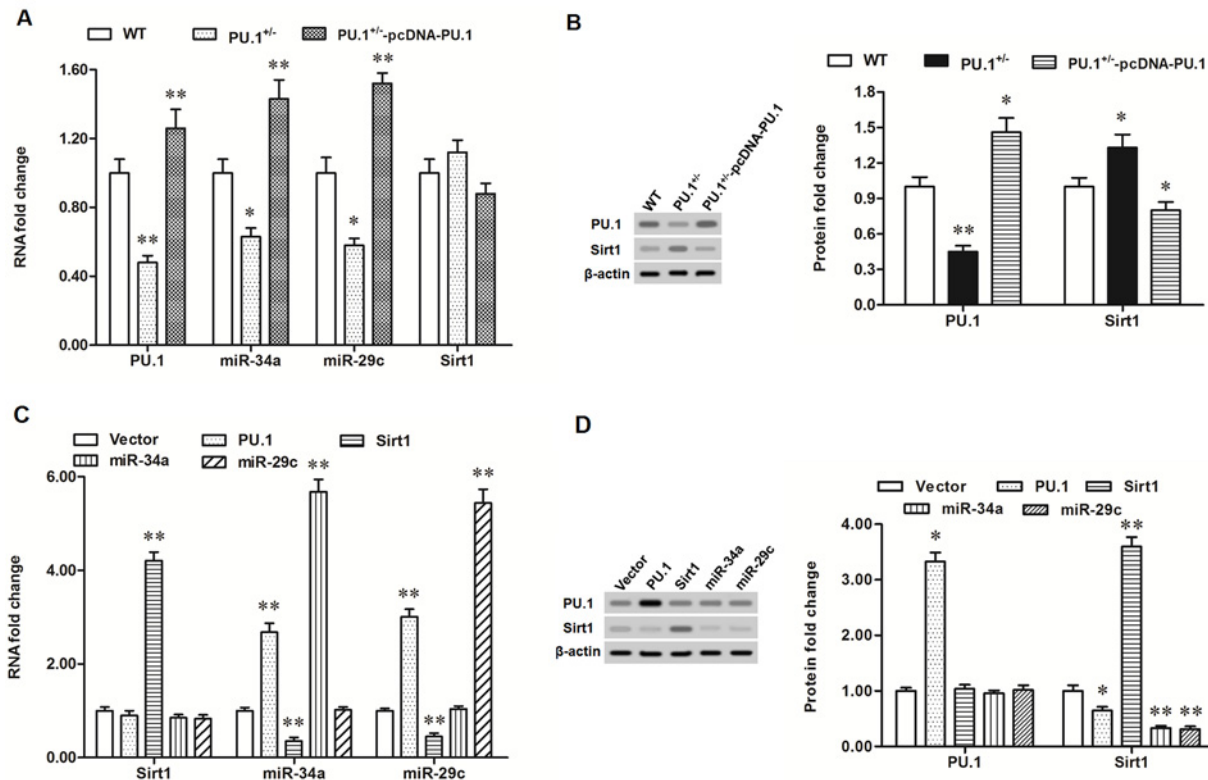

**Figure 2. PU.1 overexpression increased *miR-34a* and *miR-29c* levels and suppressed expression of Sirt1 protein**  
**(A)** PU.1 promoted expression of *miR-34a* and *miR-29c* in PU.1<sup>+/-</sup> HSCs. **(B)** PU.1 overexpression suppressed expression of Sirt1 protein in PU.1<sup>+/-</sup> HSCs. Primary HSCs were isolated from newborn WT and PU.1<sup>+/-</sup> mice and cultured *in vitro*. The pcDNA-PU.1 expression vector (2 μg) was transfected into PU.1<sup>+/-</sup> HSCs. After transfection for 48 h, qPCR analysis was used to detect the RNA levels of PU.1, Sirt1, *miR-34a* and *miR-29c* in WT HSCs, PU.1<sup>+/-</sup> HSCs and PU.1<sup>+/-</sup> HSCs transfected the pcDNA-PU.1. Western blotting was used to detect the protein levels of PU.1 and Sirt1. *n*=8, \**P*<0.05, \*\**P*<0.01 compared with WT. **(C)** Overexpression of *miR-34a* and *miR-29c* both had no effect on *Sirt1* mRNA, but overexpression of Sirt1 suppressed expression of *miR-34a* and *miR-29c*. **(D)** Overexpression of *miR-34a* and *miR-29c* both sharply reduced expression of Sirt1 protein, but had no effect on PU.1 protein. The pcDNA-PU.1 expression vector (2 μg), pcDNA-Sirt1 expression vector (2 μg), *miR-34a* mimic (60 pmol), and *miR-29c* mimic (60 pmol) were respectively transfected into PU.1<sup>+/-</sup> HSCs. After transfection for 48 h, the RNA levels of PU.1, Sirt1, *miR-34a*, and *miR-29c* were detected with qPCR. The levels of PU.1 and Sirt1 proteins were detected with Western blotting. *n*=8, \**P*<0.05, \*\**P*<0.01 compared with Vector.

## Materials and methods

### Animals and ethics statements

Newborn male C57BL/6J mice, including PU.1 single allele deficient (PU.1<sup>+/-</sup>) and WT mice were purchased from Shanghai Laboratory Animal Center of Chinese Academy of Sciences. All animal procedures described herein were approved by the Ethical Committee of Yantai Hospital in accordance with the Chinese Experimental Animal Welfare and Ethical Norms promulgated in 2016. The mice were killed immediately after the experimentation in a Mobile Anesthetic Workstation (Harvard Apparatus, Harvard Bioscience Inc., Cambridge, MA).

### Isolation and culture of mouse primary HSCs

Mouse primary HSCs were isolated from C57BL/6J PU.1<sup>+/-</sup> and WT mice using a pronase/collagenase digestion method as previously described [15]. The cells were identified by morphology observation and immunohistochemistry assay to confirm their features and purity (Supplementary Figure S1). The cells were then grown on untreated Petri dishes (BD Falcon, Franklin Lakes, NJ), being maintained in a low-glucose DMEM/F12 medium supplemented with 10% FBS, 4 mM L-glutamine and P/S (100 U/100 μg per ml). Cells were cultured in a 37°C humidified cell culture chamber with 5% CO<sub>2</sub>.

**Table 1 SYBR Green real-time qPCR primer sequences**

| Genes                  | Primers | Sequences (5'3')          |
|------------------------|---------|---------------------------|
| 18S                    | Forward | gaataatggaataggaccocgg    |
|                        | Reverse | ggaactacgacggatctgac      |
| collagen(I) $\alpha$ 1 | Forward | caaggtcctctggatcaagtg     |
|                        | Reverse | cctttatgcctctgtcaccttg    |
| IL-1 $\beta$           | Forward | catccagcttcaaatctgcag     |
|                        | Reverse | cacaccaccagcaggttatcatc   |
| TGF- $\beta$ 1         | Forward | gcggactactatgctaaagagg    |
|                        | Reverse | gtagagttccacatgttgctcc    |
| PU.1                   | Forward | gtagcgcaagagattatgcaaac   |
|                        | Reverse | gcacaagttcctgatttatcgaa   |
| miR-34a                | Forward | cacgcatggcagtgcttagc      |
|                        | Reverse | cagtgcagggtccgaggta       |
| miR-29c                | Forward | tagcaccattgaaatcggta      |
|                        | Reverse | taaccgattcaaatgggtgcta    |
| Sirt1                  | Forward | aatccagtcattaacgggtctacaa |
|                        | Reverse | taggaccattactgccagagg     |

## Transfection of plasmids and oligos

Overexpression vectors pcDNA-PU.1, pcDNA-Sirt1, and pcDNA-3.1 empty vector were kindly presented by Laboratory of Animal Fat Deposition and Muscle Development, Northwest A&F University (Yangling, China). Sirt1 siRNA and oligo mimics/inhibitors of miRNAs were designed and synthesized by Ribobio Co., Ltd. (Guangzhou, China). For transfection, cells were seeded into six-well plates at a density of  $10^5$ /ml. On preadipocytes reaching 70–80% confluence, serum-free DMEM/F12 medium was used to starve the cells for 2 h. Then the serum-free medium was replaced by fresh DMEM/F12 medium supplemented with 10% FBS, 2  $\mu$ g of each plasmid, or 60 pmol of each oligo were transfected with X-tremeGENE HP DNA Transfection Reagent (Roche) according to the manufacturer's instructions. After incubation for 18 h, the medium was changed into fresh (DMEM/F12 medium supplemented with 10% FBS). After another 48 h, the cells were harvested for the following assays.

## Quantitative real-time PCR

Total RNA was extracted with TRIzol agent (Invitrogen) and then was used to synthesize cDNA using MMLV reverse transcriptase (Takara, Dalian, China) and oligo (dT) 18 primer following the manufacturer's protocol. The quantitative real-time PCR (qPCR) were carried out in a final volume of 25  $\mu$ l, using SYBR Premix Ex Taq (TaKaRa), 0.4 mM of each primer, and 250 ng of cDNA template. Each individual sample was run in triplicate wells. The reactions were initially denatured at 95°C for 1 min followed by 35 cycles at 94°C for 15 s, 56°C for 30 s, and 72°C for 20 s. The density of SYBR Green I and the threshold cycle ( $C_t$ ) value were analyzed by iQ<sup>TM</sup>5 Optical System Software 2.1 (Bio-Rad, Hercules, CA). The changes in transcript abundance were calculated using the  $2^{-\Delta\Delta C_t}$  method. The primers applied in the qPCR reactions are listed in Table 1.

## Western blotting

Fifty micrograms of protein of each sample were separated by SDS/PAGE (12% gel) and electrotransferred on to PVDF membrane (Millipore, Boston, MA) for immunoblot analysis. The following primary antibodies were used: anti-PU.1 (Cell Signaling, 1:300), anti-Sirt1 (Abcam, 1:300), type I collagen (Abcam, 1:500), anti- $\alpha$ -smooth muscle actin ( $\alpha$ -SMA) (Abcam, 1:500), and anti- $\beta$ -actin (Santa Cruz Biotechnology, 1:800) which was regarded as the internal control. After incubation with the appropriate HRP-conjugated secondary antibody (Abcam), protein levels were detected using a ChemiDoc XRS imaging system and analysed by software Quantity One (Bio-Rad).

## Online references

The relationships between the transcription factor PU.1 and its potential target DNA sequences (promoter sequences of pri-miR-34a and pri-miR-29c) were predicted in ChIPBase, an online database decoding transcription factor binding maps and transcriptional regulation: [http://rna.sysu.edu.cn/chipbase/regulation/browse.php?organism=mouse&assembly=mm10&protein=Sp1&sample\\_id=MOUMM00068&type=miRNA&upstream=30kb&downstream=10kb&motif\\_status=Y&target\\_symbol.](http://rna.sysu.edu.cn/chipbase/regulation/browse.php?organism=mouse&assembly=mm10&protein=Sp1&sample_id=MOUMM00068&type=miRNA&upstream=30kb&downstream=10kb&motif_status=Y&target_symbol.)

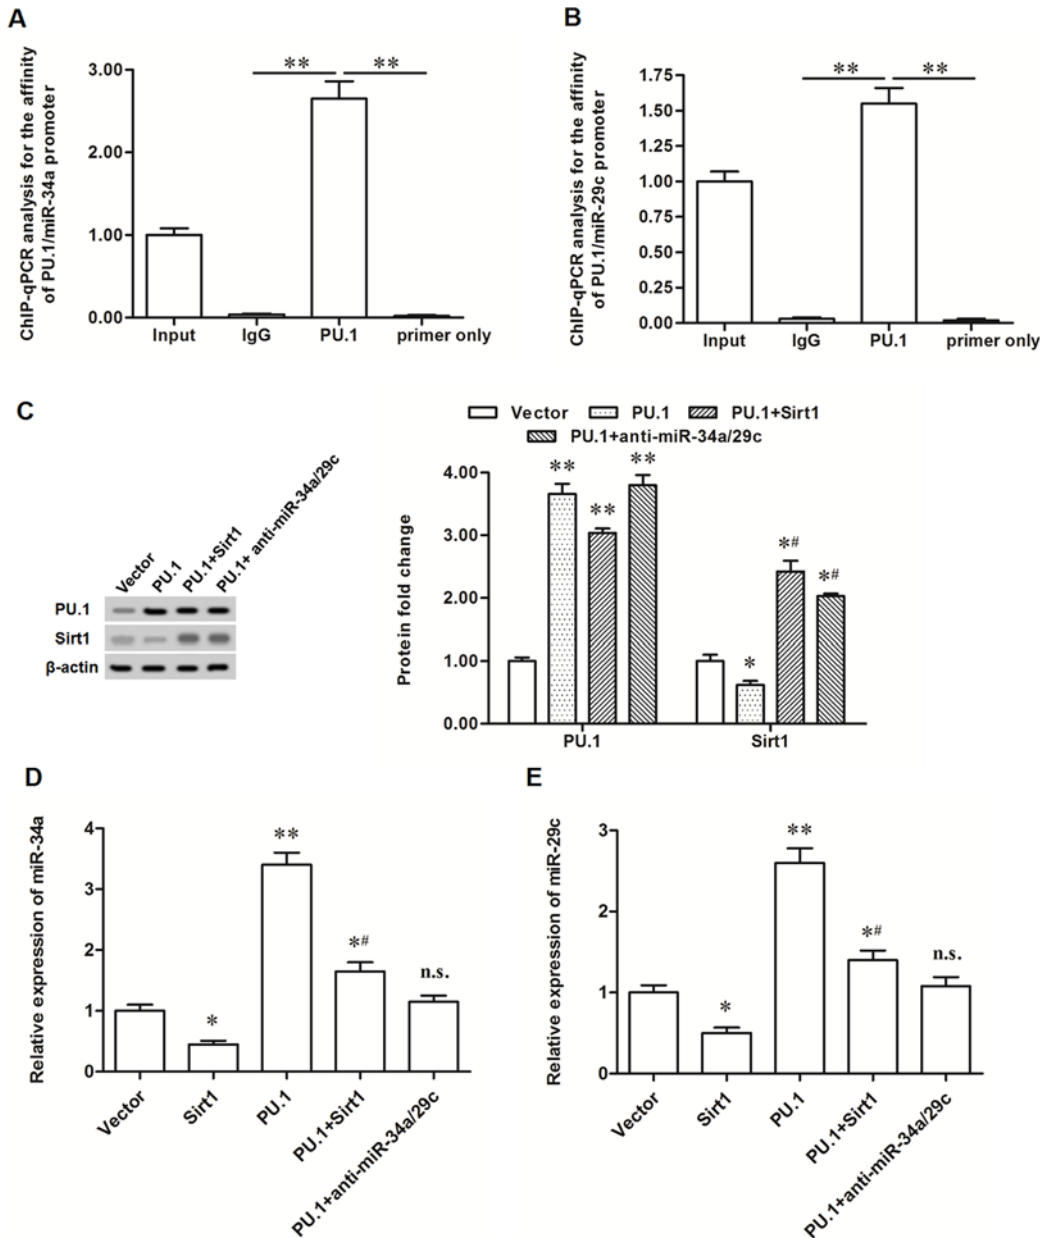

**Figure 3. PU.1 negatively regulated Sirt1 protein expression via transcriptional promotion of *miR-34a* and *miR-29c* in PU.1<sup>+/-</sup> HSCs**

(A) PU.1 displayed high binding capacity to the *miR-34a* promoter. (B) PU.1 displayed high binding capacity to the *miR-29c* promoter. Primary HSCs were isolated from newborn WT mice and cultured *in vitro*. PU.1 antibody was applied in the ChIP assay for the binding capacity of PU.1 to *miR-34a* or *miR-29c* in the HSCs. qPCR was used to detect the abundance in the protein–DNA complex bound by PU.1 antibody. Total DNA input was regarded as the positive control. IgG was regarded as the negative control in the ChIP assay. Adding primers only was regarded as the negative control in the qPCR assay.  $n=4$ ,  $**P<0.01$ . (C) Inhibition of *miR-34a* and *miR-29c* could reverse the down-regulation of Sirt1 protein caused by PU.1 overexpression. (D,E) Transfection with antagonists of *miR-34a/29c* antagonized the promoting effect of PU.1 on expression of *miR-34a* and *miR-29c*. Primary HSCs were isolated from newborn WT mice and cultured *in vitro*. On reaching 70% confluence, the pcDNA-Sirt1 expression vector, pcDNA-PU.1 expression vector and inhibitors of *miR-34a/miR-29c* were individually transfected or co-transfected into WT HSCs. After transfection for 48 h, levels of PU.1 and Sirt1 proteins were detected with Western blotting. The relative expression of *miR-34a* and *miR-29c* were detected with qPCR.  $n=8$ ,  $*P<0.05$ ,  $**P<0.01$  compared with Vector,  $\#P<0.05$  compared with PU.1. n.s. = no significant

## ChIP-qPCR assay

Cells were cross-linked by adding formaldehyde to a final concentration of 1% at room temperature for 10 min. After washing four times with 20 ml PBS in 50-ml conical tubes, cells were scraped and swelled in hypotonic swelling buffer (25 mM HEPES (pH 7.8), 1.5 mM MgCl<sub>2</sub>, 10 mM KCl, 0.1% NP-40, protease inhibitor cocktail from Sigma) and incubated on ice for 10 min. Following centrifugation at 2000 rpm for 5 min, the nuclei were lysed in SDS lysis buffer (1% SDS, 10 mM EDTA, and 50 mM Tris) and sonicated with Branson 150 sonicator. Antibody against PU.1 was used for ChIP, and qPCR was carried out with specific primers to amplify the PU.1-binding region of the *miR-34a* promoter (forward: 5'-CAG CCT GGA GGA GGA TCG A-3'; reverse, 5'-TCC CAA AGC CCC CAA TCT-3') and *miR-29c* promoter (forward: 5'-GCA AAT CGC GTA GTA TCA G-3'; reverse, 5'-TGA CAG AGA CTC CAG ACT-3').

## Cell proliferation and migration assays

Following transfection for 48 h, proliferation of the cells was detected with Cell Counting Kit-8 solution (Dojindo Laboratories, Kumamoto, Japan) according to the manufacturer's instructions.

Cell migration was detected with the Transwell migration assay. Following transfection for 48 h,  $3.5 \times 10^4$  cells were grown in the top chamber with a non-coated membrane (24-well insert; 8  $\mu$ m; Corning) with serum-free medium. Medium containing 10% serum was used as a chemoattractant in the lower chamber. The cells were incubated for 24 h. Then a cotton swab was used to remove the non-migrated cells in the upper chamber, and the filters were individually stained with 2% Crystal Violet. The migrated cells adhering to the underside of the filter were examined and counted under a light microscope (Olympus IX70; Olympus Corporation, Osaka, Japan).

## Establishment of liver fibrosis model

Animal model of liver fibrosis was established by intraperitoneal injections of thioacetamide (TAA; Sigma-Aldrich, Munich, Germany). TAA (200 mg/l) was administered in WT and PU.1<sup>+/-</sup> mice for 6, 10, or 16 weeks, respectively.

## Hepatic fibrosis evaluation

Liver tissue was fixed in formaldehyde and embedded by paraffin. The embedded samples were sliced into 6- $\mu$ m sections and then stained with HT15-1KT Masson's trichrome kit (Sigma) according to the manufacturer's instructions. Morphometric analysis of hepatic fibrosis was performed using semiquantitative fibrosis scores based on the Ishak Scoring System (Grading of Hepatic Necrotic Inflammation).

## Detection of ROS and MDA

Fifty grams of liver tissue was homogenated in 1 l DMEM/F12 medium. ROS and MDA contents were respectively detected with Total ROS Detection Kit for Fluorescence Microscopy/Flow Cytometry and Mouse MDA ELISA Detection Kit (BestBio, Shanghai, China) according to the manufacturer's instructions.

## Liver function tests

Sixty microliters of 10% chloral hydrate was intraperitoneally injected into mice for anesthesia. Approximately 5 min later, iodophor was used to disinfect the superficial coat of right eye, and then the mice were fixed and punctured for orbital vein blood. Serum was separated for analyzing the activity of ALT and AST in the Yantaishan Hospital utilizing a Roche P module analyzer.

## Detection of total collagen content

Total collagen was determined by hydroxyproline quantitation. Mouse liver tissue was hydrolyzed with 6 N HCl at 110°C overnight. The hydrolysate was filtered through 45- $\mu$ m filters, and the filtrate was dissolved in 50% isopropanol. Hydroxyproline contents were detected with a General Hydroxyproline (Hyp) ELISA Kit (Sigma). Absorbance of each sample was measured at 450 nm using a microplate reader (Packard BioScience, Meriden, CT, U.S.A.). Hydroxyproline levels were expressed as mg hydroxyproline per gram liver tissue.

## Statistical analysis

All statistical analyses were performed using SPSS 19.0 statistical software (SPSS, Inc.). Data were presented as means  $\pm$  S.E.M. Comparisons were made by one-way ANOVA. Significance was set at  $P < 0.05$ .

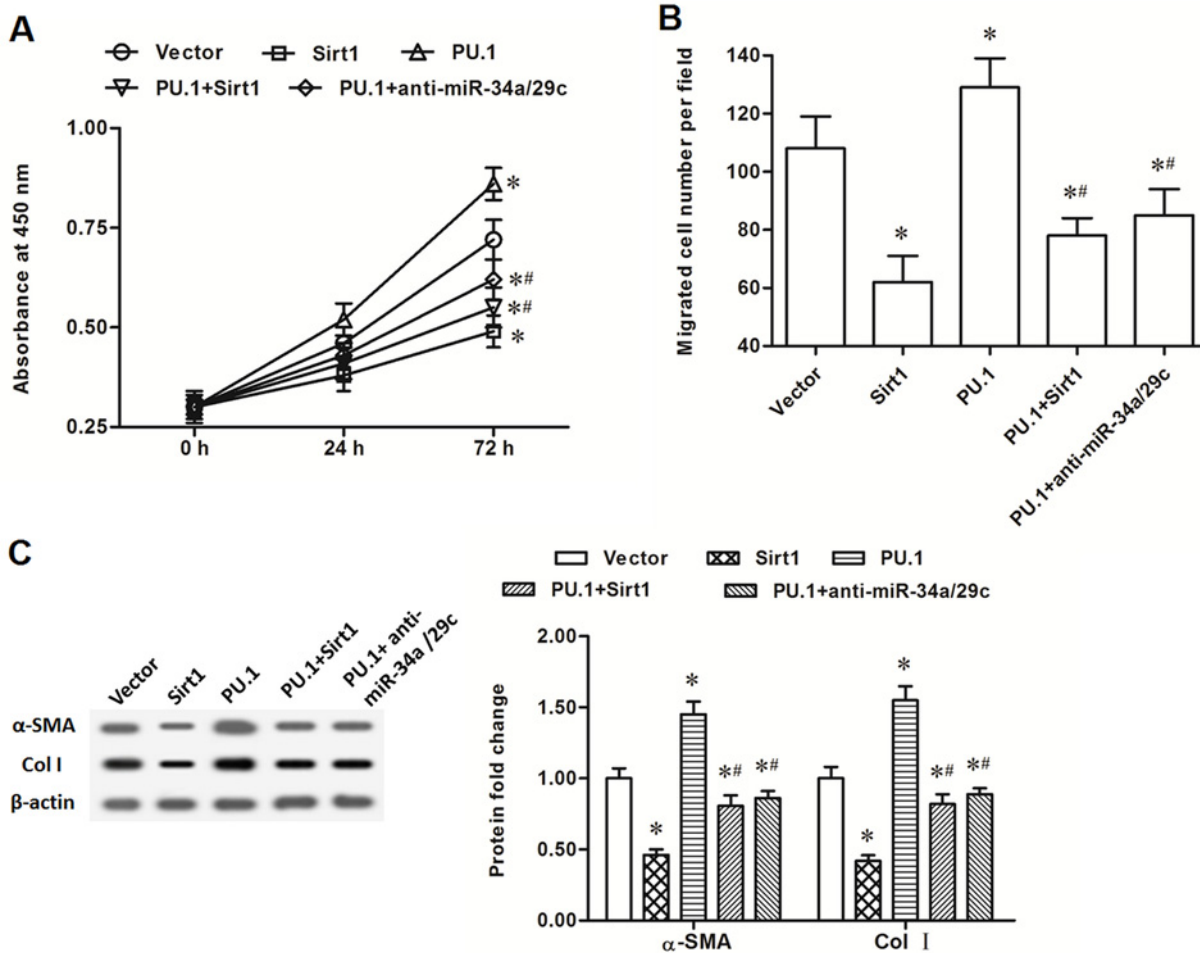

**Figure 4. PU.1 overexpression promoted the proliferation, migration, and activation of HSCs**

(A) PU.1 overexpression promoted the proliferation of HSCs. (B) PU.1 overexpression promoted the migration of HSCs. (C) PU.1 overexpression promoted the expression of activated marker proteins of HSCs. Primary HSCs were isolated from newborn WT mice and cultured *in vitro*. On reaching 70% confluence, the pcDNA-PU.1 expression vector, pcDNA-Sirt1 expression vector, pcDNA-PU.1 plus pcDNA-Sirt1, or pcDNA-PU.1 plus inhibitors of miR-34a/29c were respectively transfected into WT HSCs. After transfection for 48 h, cell proliferation was detected with CCK-8 assay, cell migration was detected with Transwell migration assay, and the levels of Coll and  $\alpha$ -SMA proteins were detected with Western blotting.  $n=8$ , \* $P<0.05$  compared with Vector, # $P<0.05$  compared with PU.1.

## Results

### PU.1 depletion increased the Sirt1 protein level but did not alter the level of Sirt1 mRNA

Primary HSCs were isolated from WT and PU.1<sup>+/-</sup> mice. The expression of PU.1 and Sirt1 in the HSCs were detected with qPCR and Western blotting. The results showed that the levels of *PU.1* mRNA and protein were reduced by approximately 50% in the HSCs from PU.1<sup>+/-</sup> mice (Figure 1A,C). PU.1 depletion did not influence the expression of *Sirt1* mRNA (Figure 1B) but caused a modest increase in that of Sirt1 protein (by approximately 40%,  $P<0.05$ , Figure 1C). These data suggested that PU.1 might regulate the expression of *Sirt1* gene at a stage after transcription.

### PU.1 overexpression increased expression of miR-34a/29c and suppressed Sirt1 protein level in PU.1<sup>+/-</sup> HSCs

*MiR-34a* and *miR-29c* are two validated miRNAs that could target Sirt1. HSCs were respectively isolated from WT and PU.1<sup>+/-</sup> mice, and the pcDNA-PU.1 expression vector was transfected into PU.1<sup>+/-</sup> HSCs. The levels of *miR-34a*

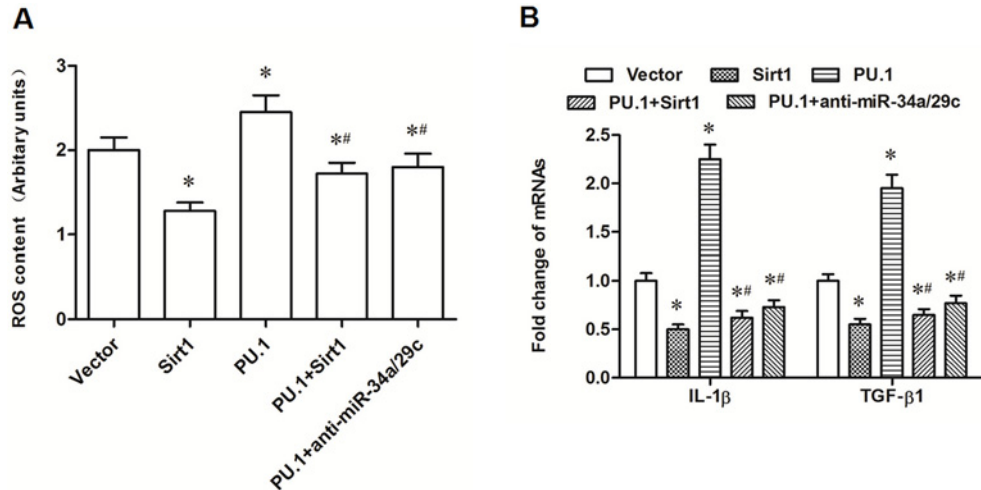

**Figure 5. PU.1 overexpression increased ROS content and inflammatory gene expression in HSCs**

(A) PU.1 overexpression increased ROS content in HSCs, which could be antagonized by either Sirt1 overexpression or inhibition of *miR-34a/-29c*. (B) PU.1 overexpression promoted the expression of inflammatory genes IL-1 $\beta$  and TGF- $\beta$ 1, which could be antagonized by either Sirt1 overexpression or inhibition of *miR-34a/-29c*. Primary HSCs were isolated from newborn WT mice and cultured *in vitro*. On reaching 70% confluence, the pcDNA-PU.1 expression vector, pcDNA-Sirt1 expression vector, pcDNA-PU.1 plus pcDNA-Sirt1, or pcDNA-PU.1 plus inhibitors of *miR-34a/-29c* were respectively transfected into WT HSCs. After transfection for 48 h, ROS content in the cells was detected with Total ROS Detection Kit. Total RNA was extracted, and the mRNA levels of IL-1 $\beta$  and TGF- $\beta$ 1 were detected with qPCR.  $n=8$ , \* $P<0.05$  compared with Vector, # $P<0.05$  compared with PU.1.

and *miR-29c* were detected in the WT HSCs, PU.1<sup>+/-</sup> HSCs and pcDNA-PU.1-transfected PU.1<sup>+/-</sup> HSCs. Compared with the WT HSCs, PU.1<sup>+/-</sup> HSCs displayed significantly lower levels of *miR-34a* and *miR-29c*, while PU.1 overexpression inverted the decrease in their levels (Figure 2A). Besides, PU.1<sup>+/-</sup> HSCs displayed a higher level of Sirt1 protein, and PU.1 sharply suppressed Sirt1 protein expression (Figure 2B).

Then, PU.1<sup>+/-</sup> HSCs were transfected with the pcDNA-PU.1, pcDNA-Sirt1, *miR-34a* mimic or *miR-29c*, and the levels of Sirt1, *miR-34a*, and *miR-29c* were detected. The results showed that PU.1 overexpression significantly increased the levels of *miR-34a* and *miR-29c* (Figure 2C), and decreased the Sirt1 protein level in PU.1<sup>+/-</sup> HSCs (Figure 2D). Overexpression of either *miR-34a* or *miR-29c* did not influence the level of PU.1, but sharply reduced the Sirt1 protein expression (Figure 2D).

### PU.1 transcriptionally regulated the expression of *miR-34a* and *miR-29c*

For PU.1, overexpression had a markedly positive effect on the expression of *miR-34a* and *miR-29c*, we suspected that PU.1 might be a transcription factor of *miR-34a* and *miR-29c*. ChIPBase, an online database decoding transcription factor binding maps and transcriptional regulation, revealed that *miR-34a* and *miR-29c* are of the several hundred miRNAs potentially regulated by the transcription factor PU.1. ChIP-qPCR was used to verify the binding of PU.1 with the promoters of *miR-34a* and *miR-29c*. The results showed that, compared with IgG control, we detected abundant levels of target transcripts in the protein-DNA complexes bound by PU.1 antibody (Figure 3A,B), indicating that PU.1 was a transcription factor directly regulating *miR-34a* and *miR-29c* expression.

### Inhibition of *miR-34a* and -29c inversed the reduction in Sirt1 protein by PU.1 overexpression

It was suggested from all the data above that PU.1 suppressed the expression of Sirt1 through promoting the expression of *miR-34a* and *miR-29c*. To confirm that, the pcDNA-Sirt1 expression vector, pcDNA-PU.1 expression vector or inhibitors of *miR-34a/miR-29c* were individually transfected or co-transfected into WT HSCs. Our data on Western blotting indicated that the suppression by PU.1 overexpression could be inversed by either Sirt1 overexpression or inhibition of *miR-34a* and *miR-29c* (Figure 3C). Moreover, the increase in levels of *miR-34a* and *miR-29c* could be antagonized by either Sirt1 overexpression or inhibition of *miR-34a* and *miR-29c* (Figure 3D,E).



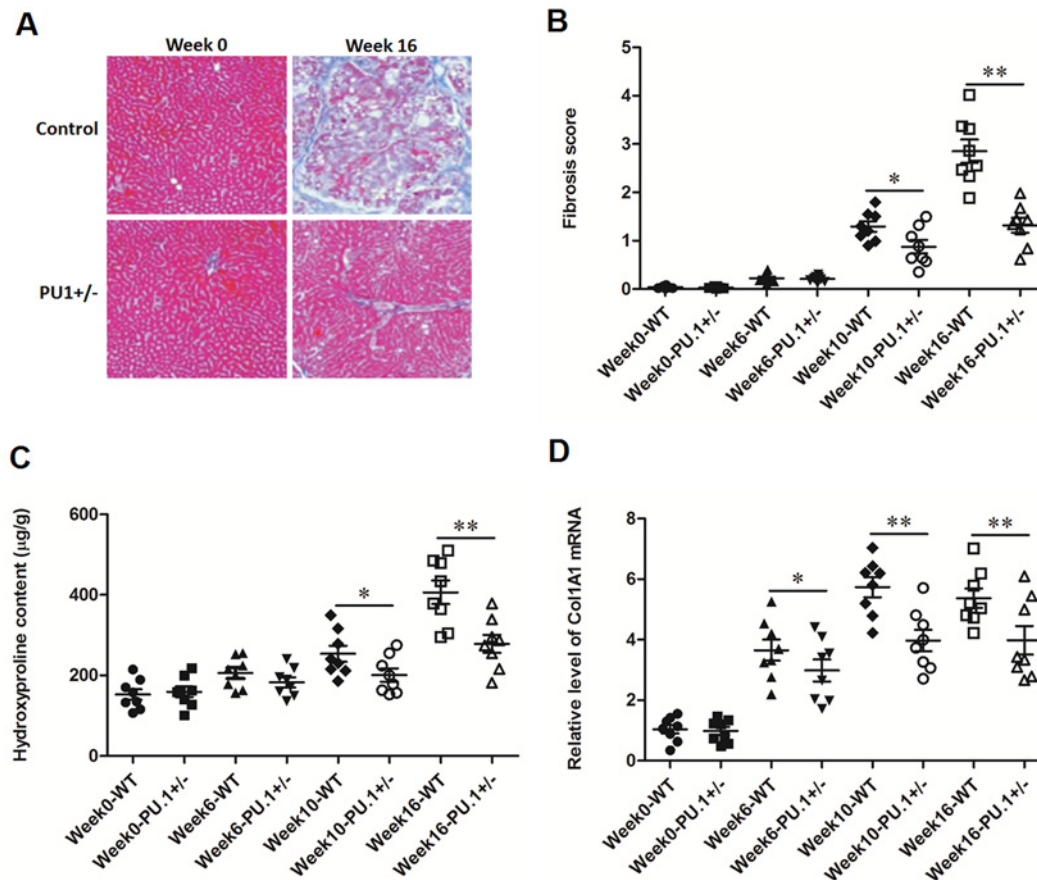

**Figure 6.** PU.1<sup>+/-</sup> mice displayed resistance to TAA-induced liver fibrosis

(A) PU.1<sup>+/-</sup> mice displayed an obviously lower degree of liver fibrosis in response to TAA treatment compared with WT mice. (B) PU.1<sup>+/-</sup> mice had significantly lower hepatic fibrosis scores in response to TAA treatment. (C) PU.1<sup>+/-</sup> mice had significantly lower total hepatic collagen content in response to TAA treatment. (D) PU.1<sup>+/-</sup> mice displayed significantly lower levels of hepatic *Col1A1* mRNA in response to TAA treatment. Animal model of liver fibrosis was established by intraperitoneal injection of 10 mg/ml TAA (5 µl every other day) in WT and PU.1<sup>+/-</sup> mice, respectively. On the first day (week 0) and the weekends of weeks 6, 10, and 16, liver tissues were isolated. Masson's trichrome staining was used to detect the tissue fibrosis, fibrosis score of the liver was evaluated by the semiquantitative fibrosis scores, total collagen content in liver tissue was detected with the hydroxyproline quantitation method, and *Col1A1* mRNA expression in liver tissue was detected with qPCR. *n*=8. \**P*<0.05, \*\**P*<0.01 compared with WT.

## PU.1 overexpression promoted the proliferation, migration, activation, oxidative stress and inflammatory response in HSCs via suppression of Sirt1 protein

It has been proven that Sirt1 inhibited the proliferation, migration, and activation of HSCs, so PU.1 probably played a positive role in those processes for its suppression on Sirt1 protein. The data on CCK-8 and Transwell migration assays indicated that PU.1 overexpression increased the cell proliferation and migration (Figure 4A,B). Western blotting analysis showed that PU.1 overexpression increased the levels of α-SMA and type I collagen (Figure 4C), which were regarded as markers for HSC activation. As expected, the increase in cell proliferation, migration, and activation was inverted by either Sirt1 overexpression or inhibition of *miR-34a/-29c* (Figure 4A–C). Moreover, PU.1 overexpression increased the ROS content and expression of proinflammatory genes *IL-1β* and *TGF-β1*, and the increase could be inverted by either Sirt1 overexpression or inhibition of *miR-34a/-29c* (Figure 5A,B). These results indicated that PU.1 positively regulate the proliferation, migration, activation, oxidative stress and inflammatory response in HSCs via suppression of Sirt1 protein expression.

**Table 2** Dynamic changes of serum ALT and AST levels during ahiocetamide administration in mice (Data were expressed as means  $\pm$  standard errors)

| Time    | Groups              | ALT (U/L)        | AST (U/L)          |
|---------|---------------------|------------------|--------------------|
| Week 0  | WT                  | 39.6 $\pm$ 5.2   | 110.2 $\pm$ 15.3   |
|         | PU.1 <sup>+/-</sup> | 38.2 $\pm$ 4.5   | 108.3 $\pm$ 14.6   |
| Week 6  | WT                  | 59.6 $\pm$ 5.1   | 159.3 $\pm$ 12.6   |
|         | PU.1 <sup>+/-</sup> | 52.3 $\pm$ 4.9*  | 136.5 $\pm$ 15.0*  |
| Week 10 | WT                  | 100.3 $\pm$ 8.8  | 253.6 $\pm$ 17.5   |
|         | PU.1 <sup>+/-</sup> | 70.9 $\pm$ 7.2** | 178.4 $\pm$ 16.0** |
| Week 16 | WT                  | 90.5 $\pm$ 8.6   | 225.7 $\pm$ 19.3   |
|         | PU.1 <sup>+/-</sup> | 67.6 $\pm$ 6.8** | 164.9 $\pm$ 14.7** |

**Notes:** ALT, glutamic-pyruvic transaminase; AST, glutamic-oxaloacetic transaminase.  $N = 8$ , \* $P < 0.05$ , \*\* $P < 0.01$ .

## PU.1<sup>+/-</sup> mice displayed resistance to TAA-induced liver fibrosis and dysfunction

Finally, animal model of liver fibrosis was established by intraperitoneal injection of TAA in WT and PU.1<sup>+/-</sup> mice, respectively. At week 16 of TAA administration, Masson's trichrome staining showed that WT mice displayed serious fibrotic features in liver, while PU.1<sup>+/-</sup> mice displayed a previously lower fibrotic degree than those of WT mice (Figure 6A). The fibrosis score in the liver of PU.1<sup>+/-</sup> mice was much lower than that of WT mice at week 10 and 16 (Figure 6B). The content of total collagen and expression of ColI in the liver of PU.1<sup>+/-</sup> mice were significantly lower than that of WT mice at week 10 and 16 (Figure 6C,D). Consistently, the serum levels of ALT and AST, important indexes of liver dysfunction, were also significantly lower in PU.1<sup>+/-</sup> mice at weeks 6, 10, and 16 (Table 2). In addition, PU.1<sup>+/-</sup> mice also displayed lower levels of inflammatory genes (Figure 7A,B) and oxidative stress (Figure 7C,D). These data above demonstrated that PU.1 deficiency made mice resistant to TAA-induced liver fibrosis and dysfunction.

## Discussion

PU.1 transcription factor was characterized in 1992, which is confirmed as the product of the PU.1 oncogene located in 19q13.3-19q13.4 region of the human genome [16]. For a long time, PU.1 has been restricted as a master controller in the development of hematopoietic lineages. However, it was suggested PU.1 was not a hematopoietic lineage specific transcription factor but also influenced the cell fate and function of non-hematopoietic lineages, such as osteogenic and adipogenic [17,18]. Moreover, much recently, PU.1 was shown to be lower expressed and identified as a tumor suppressor in hepatocellular carcinoma, suggesting that PU.1 might play a role in the cell fate or function of the hepatic lineages [12]. In this study, we found that PU.1 had a positive impact on the activation of HSCs and liver fibrosis by negatively regulating the expression of Sirt1 protein. PU.1<sup>+/-</sup> mice displayed resistance to TAA-induced liver fibrosis, inflammatory response, and oxidative stress and liver dysfunction *in vivo*. To our knowledge, this is the first report that reveals the exact role of PU.1 in the regulation of Sirt1 expression and the activation of HSCs.

As a vital transcription factor, PU.1 promotes transcription of multiple genes, including protein coding and non-protein coding genes including miRNAs [13,19]. Here, we found that, both in WT and PU.1<sup>+/-</sup> HSCs, PU.1 over-expression caused a dramatic increase in expression *miR-34a* and *miR-29c*, two Sirt1 targeting miRNAs. Moreover, we demonstrated that PU.1 promoted *miR-34a* and *miR-29c* expression as a transcription factor by bioinformatics and ChIP-qPCR analyses. Many studies also revealed that PU.1 can transcriptionally promote expression of some miRNAs and functions as a negative regulator of the genes targeted by these miRNAs. For instance, PU.1 directly bound with the promoter of *miR-191* host gene, promote *miR-191* transcription, and post-transcriptionally suppressed C/EBP $\beta$  expression during adipogenesis [14]. Another example is that PU.1 can promote the transcription of *miR-615-5p* and suppress IGF2-mediated hepatoma cell invasion [12].

The gene expression regulatory mechanism of miRNAs is relatively simple. They negatively regulate their target genes by translational suppression in most cases. Therefore, a function of miRNA depends mainly on its target genes. In the current study, *miR-34a* and *miR-29c* both negatively regulated the expression of their target gene *Sirt1*. Inhibition of *miR-34a/29c* could increase Sirt1 expression and inhibited Sirt1-mediated HSC activation and inflammation. They functioned as profibrotic regulators. Very similar to the results of the present study, some researchers also proved that *miR-34a* promoted activation of HSCs and functioned as a profibrotic regulator [20,21]. For example,

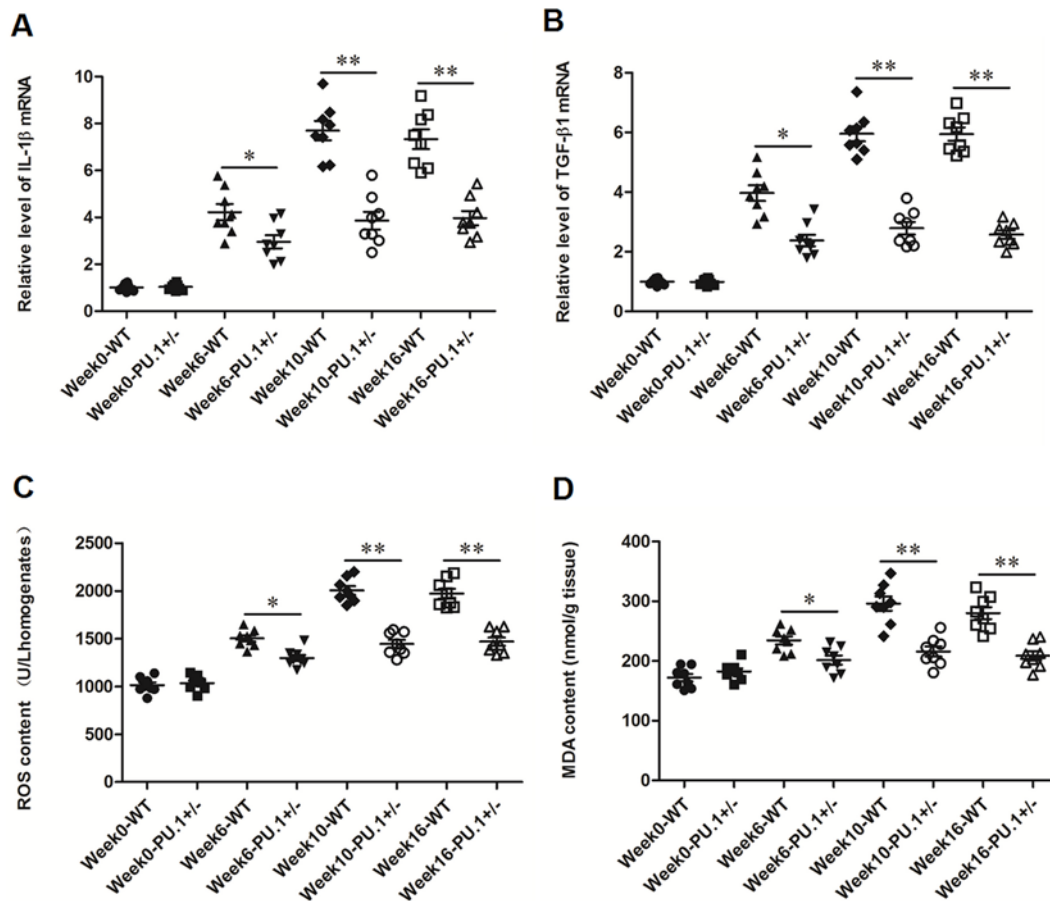

**Figure 7. PU.1<sup>+/-</sup> mice displayed lower levels of inflammatory response and oxidative stress on treatment of TAA**

(A,B) PU.1<sup>+/-</sup> mice displayed lower expression levels of *IL-1β* mRNA and *IL-1β* mRNA in response to TAA treatment compared with WT mice. (C) PU.1<sup>+/-</sup> mice displayed lower hepatic ROS content in response to TAA treatment. (D) PU.1<sup>+/-</sup> mice displayed lower hepatic MDA content in response to TAA treatment. Animal model of liver fibrosis was established by intraperitoneal injection of 10 mg/ml TAA (5  $\mu$ l every other day) in WT and PU.1<sup>+/-</sup> mice, respectively. On the first day (week 0) and the weekends of weeks 6, 10, and 16, liver tissues were isolated. *IL-1β* mRNA and *IL-1β* mRNA levels in liver tissue were detected with qPCR. ROS content and MDA in liver tissue were detected.  $n=8$ . \* $P<0.05$ , \*\* $P<0.01$  compared with WT.

Li et al. [20] identified peroxisome proliferator activated receptor  $\gamma$  (PPAR $\gamma$ ) as a target gene in HSCs, and inhibition of *miR-34a* up-regulated PPAR $\gamma$  and down-regulated the expression of  $\alpha$ -SMA. However, Kwiecinski et al. [22] proposed that *miR-29* family, including *miR-29a* and *miR-29b*, could be induced by hepatocyte growth factor or down-regulated by TGF- $\beta$ 1 stimulation, and up-regulation of *miR-29* reduced synthesis of collagen-1 and -4. The study did not show the exact role of *miR-29c* in the activation of HSCs. Moreover, the HSCs in Kwiecinski et al. [22] article were being stimulated by HGF or TGF- $\beta$ 1, but, in our study, HSCs were transfected with plasmids or oligos without any pretreatment. The exact role of *miR-29c* needs to be further characterized.

Responding to liver damage, stellate cells can change into an activated state, characterized by proliferation, contractility, and chemotaxis. Here, our results showed that Sirt1 overexpression suppressed the cell proliferation, cell migration, expression of activation markers collagen-1 and  $\alpha$ -SMA, and production of ROS, IL-1 $\beta$ , and TGF- $\beta$ 1. In addition, down-regulation of Sirt1 by PU.1 overexpression promoted the cell proliferation, cell migration, expression of activation markers collagen-1 and  $\alpha$ -SMA, and production of ROS, IL-1 $\beta$  and TGF- $\beta$ 1, which could be antagonized by either Sirt1 overexpression or inhibition of *miR-34a/-29c*. Moreover, PU.1<sup>+/-</sup> mice, which had a higher expression level of Sirt1 protein, displayed obvious resistance to TAA-induced liver fibrosis and dysfunction, manifested by a lower fibrotic score, less collagen content, better liver function, and lower levels of oxidative stress and inflammatory response. Many previous studies also revealed that Sirt1 could suppress liver fibrosis and inflammation. For example, Sirt1 liver KO mice accumulated larger amounts of hepatic lipid and expressed higher levels of

inflammatory cytokines than control mice on treatment of ethanol exposure, and serum of Sirt1 liver KO mice had increased levels of ALT and AST [23]. Actually, it has been widely acknowledged that Sirt1 played a preventive role in liver injury and fibrosis.

In conclusion, we found that PU.1 down-regulated Sirt1 expression at the translational level via promotion of *miR-34a* and *miR-29c* expression. PU.1 promoted Sirt1-mediated HSC proliferation, migration, and activation in mouse, and PU.1 deficiency made mice resistant to TAA-induced liver fibrosis and dysfunction.

### Competing interests

The authors declare that there are no competing interests associated with the manuscript.

### Funding

The authors declare that there are no sources of funding to be acknowledged.

### Author contribution

Q.L. designed the study and prepared the manuscript. Y.Z. and S.Y. performed the experiments. Y.W. and J.W. prepared the figures. W.Y. and Y.L. analyzed the results and revised the manuscript.

### Abbreviations

ALT, alanine aminotransferase; AST, aspartate aminotransferase; CCK-8, cell counting Kit-8; C/EBP $\beta$ , CCAAT enhancer binding protein  $\beta$ ; C<sub>t</sub>, threshold cycle; DMEM/F12, Dulbecco's Modified Eagle Media: Nutrient Mixutre F-12; HRP, horseradish peroxidase; HSC, hepatic stellate cell; IGF, insulin-like growth factor; IL-1, interleukin-1; KO, knockout; MDA, malondialdehyde; PPAR $\gamma$ , peroxisome proliferator activated receptor  $\gamma$ ; P/S, penicilin and streptomycin; PU, purine; PU.1, PU box binding protein; qPCR, quantitative real-time PCR; ROS, reactive oxygen species; Sirt1, sirtuin-1; TAA, thioacetamide; TGF, transforming growth factor; WT, wild-type;  $\alpha$ -SMA,  $\alpha$ -smooth muscle actin.

### References

- Bataller, R. and Brenner, D.A. (2001) Hepatic stellate cells as a target for the treatment of liver fibrosis. *Semin. Liver Dis.* **21**, 437–451
- Zhao, W., Zhang, L., Yin, Y. et al. (2011) Activated hepatic stellate cells promote hepatocellular carcinoma development in immunocompetent mice. *Int. J. Cancer* **129**, 2651–2661
- Bordone, L. and Guarente, L. (2005) Calorie restriction, SIRT1 and metabolism: understanding longevity. *Nat. Rev. Mol. Cell Biol.* **6**, 298–305
- Milner, A.J. (2011) Induction of apoptosis by inhibition of sirtuin SIRT1 expression. U.S. Pat.
- Prozorovski, T., Schulze-Topphoff, U., Glumm, R. et al. (2008) Sirt1 contributes critically to the redox-dependent fate of neural progenitors. *Nat. Cell Biol.* **10**, 385–394
- Yamakuchi, M. and Lowenstein, C.J. (2009) MiR-34, SIRT1 and p53: the feedback loop. *Cell Cycle* **8**, 712–715
- Li, N., Muthusamy, S. and Liang, R. (2011) Increased expression of miR-34a and miR-93 in rat liver during aging, and their impact on the expression of Mgst1 and Sirt1. *Mech. Ageing Dev.* **132**, 75–85
- Qi, F., Hu, J.F., Liu, B.H. et al. (2015) *MIR-9a-5p* regulates proliferation and migration of hepatic stellate cells under pressure through inhibition of Sirt1. *World J. Gastroenterol.* **21**, 9900–9915
- Xu, F., Gao, Z.G., Zhang, J. et al. (2010) Lack of SIRT1 (mammalian sirtuin 1) activity leads to liver steatosis in the SIRT1 $\pm$  mice: a role of lipid mobilization and inflammation. *Endocrinology* **151**, 2504–2514
- Polli, M., Dakic, A., Light, A., Wu, L., Tarlinton, D.M. and Nutt, S.L. (2005) The development of functional B lymphocytes in conditional PU.1 knock-out mice. *Blood* **106**, 2083–2090
- Scott, E.W., Simon, M.C., Anastasi, J. and Singh, H. (1994) Requirement of transcription factor PU.1 in the development of multiple hematopoietic lineages. *Science* **265**, 1573–1577
- Song, L.J., Zhang, W.J., Chang, Z.W. et al. (2015) PU.1 is identified as a novel metastasis suppressor in hepatocellular carcinoma regulating the *miR-615-5p*/IGF2 axis. *Asian Pac. J. Cancer Prev.* **16**, 3667–3671
- Chen, M.T., Lin, H.S., Shen, C. et al. (2015) PU.1-regulated long noncoding RNA Inc-MC controls human monocyte/macrophage differentiation through interaction with microRNA 199a-5p. *Mol. Cell. Biol.* **35**, 3212–3224
- Ji, S., Li, W., Bao, L. et al. (2014) PU.1 promotes miR-191 to inhibit adipogenesis in 3T3-L1 preadipocytes. *Biochem. Biophys. Res. Commun.* **451**, 329–333
- Yue, Y., Kim, B., Park, Y.K., Koo, S.I. and Lee, J.Y. (2015) Astaxanthin prevents TGF $\beta$ 1-induced pro-fibrogenic gene expression by inhibiting Smad3 activation in hepatic stellate cells. *Biochim. Biophys. Acta* **1850**, 178–185
- Ray, D., Bosselut, R., Ghysdael, J., Mattei, M.G., Tavittian, A. and Moreaugachelin, F. (1992) Characterization of Spi-B, a transcription factor related to the putative oncoprotein Spi-1/PU.1. *Mol. Cell. Biol.* **12**, 4297–4304
- Tondravi, M.M., McKecher, S.R., Anderson, K. et al. (1997) Osteopetrosis in mice lacking haematopoietic transcription factor PU.1. *Nature* **386**, 81–84
- Wei, N., Wang, Y., Xu, R.X. et al. (2015) PU.1 antisense lncRNA against its mRNA translation promotes adipogenesis in porcine preadipocytes. *Anim. Genet.* **46**, 133–140

- 19 Sun, Y., Sun, J., Tomomi, T. et al. (2013) PU.1-dependent transcriptional regulation of miR-142 contributes to its hematopoietic cell-specific expression and modulation of IL-6. *J. Immunol.* **190**, 4005–4013
- 20 Li, X., Chen, Y., Wu, S. et al. (2015) microRNA-34a and microRNA-34c promote the activation of human hepatic stellate cells by targeting peroxisome proliferator-activated receptor  $\gamma$ . *Mol. Med. Rep.* **11**, 1017–1024
- 21 Kitano, M. and Bloomston, P.M. (2016) Hepatic stellate cells and microRNAs in pathogenesis of liver fibrosis. *J. Clin. Med.* **5**, 38
- 22 Kwiecinski, M., Noetel, A., Elfimova, N. et al. (2011) Hepatocyte growth factor (HGF) inhibits collagen I and IV synthesis in hepatic stellate cells by miRNA-29 induction. *PLoS ONE* **6**, e24568
- 23 Yin, H., Hu, M., Liang, X. et al. (2014) Deletion of SIRT1 from hepatocytes in mice disrupts lipin-1 signaling and aggravates alcoholic fatty liver. *Gastroenterology* **146**, 801–811
